# Supplementary material for: Molecular insights into genome-wide association studies of chronic kidney disease-defining traits
Source: PubMed Central journal article supplement (PMC6250666; doi:10.1038/s41467-018-07260-4), 2018-11-22
Supplement: 41467_2018_7260_MOESM2_ESM.pdf [file 41467_2018_7260_MOESM2_ESM.pdf]

Supplementary information

**Molecular insights into genome-wide association studies of chronic  
kidney disease-defining traits**

Xu et al.

**Supplementary table 1.** General characteristics of the TRANSLATE study and TCGA.

|                                   | <b>TRANSLATE</b> | <b>TCGA</b>    |
|-----------------------------------|------------------|----------------|
| n                                 | 180              | 100            |
| Age (years)                       | 61.3 (10.7)      | 61.2 (13.2)    |
| Men                               | 99 (55%)         | 70 (70%)       |
| Ethnicity                         | white European   | white European |
| BMI (kg/m <sup>2</sup> )          | 27.8 (5.3)       | NA             |
| eGFR (ml/min/1.73m <sup>2</sup> ) | 76.2 (20.1)      | NA             |

Data are counts and percentages or means and standard deviations where appropriate, n - number of individuals, BMI - body mass index, eGFR - estimated glomerular filtration rate. In TRANSLATE Study circulating concentrations of creatinine, were used to calculate eGFR based on the EPI equation [Levey, A. S. et al. A new equation to estimate glomerular filtration rate. *Ann. Intern. Med.* 150, 604–612 (2009)].

**Supplementary table 2.** Number of genome-wide association study-pleiotropic or non-pleiotropic eSNPs (single nucleotide variants transcriptionally active in the kidney) stratified upon kidney-specificity (tissue-specific versus ubiquitous).

|                                     | <b>Kidney-specific</b> | <b>Ubiquitous</b> |
|-------------------------------------|------------------------|-------------------|
| Non-pleiotropy                      | 5                      | 16                |
| Pleiotropy                          | 1                      | 31                |
| Fisher's exact test P-value: 0.0307 |                        |                   |

**Supplementary table 3.** Colocalisation analyses.

| ID  | CKD-dt<br>GWAS<br>SNP<br>dbSNP<br>rsID | CKD-dt<br>GWAS<br>SNP<br>Position | CKD-<br>dt<br>GWAS<br>SNP<br>Chr | Renal eGene     | Renal eGene<br>symbol     | RTC<br>score | Coloc-<br>alised |
|-----|----------------------------------------|-----------------------------------|----------------------------------|-----------------|---------------------------|--------------|------------------|
| 1   | rs12124078                             | 15869899                          | 1                                | ENSG00000132906 | <i>CASP9</i>              | 0.93         | Yes              |
| 6   | rs2049805                              | 155194980                         | 1                                | ENSG00000160766 | <i>GBAP1</i>              | 0.77         | No               |
| 6   | rs2049805                              | 155194980                         | 1                                | ENSG00000185499 | <i>MUC1</i>               | 0.97         | Yes              |
| 7   | rs6677604                              | 196686918                         | 1                                | ENSG00000244414 | <i>CFHR1</i>              | 0.55         | No               |
| 9   | rs2802729                              | 243501763                         | 1                                | ENSG00000054282 | <i>SDCCAG8</i>            | NA           | No               |
| 13  | rs10206899                             | 73900900                          | 2                                | ENSG00000204872 | <i>NAT8B</i>              | 0.99         | Yes              |
| 24  | rs347685                               | 141807137                         | 3                                | ENSG00000114126 | <i>TFDP2</i>              | 0.99         | Yes              |
| 31  | rs228611                               | 103561709                         | 4                                | ENSG00000246560 | <i>RP11-10L12.4</i>       | 0.90         | Yes              |
| 34  | rs12654812                             | 176794191                         | 5                                | ENSG00000169220 | <i>RGS14</i>              | 0.43         | No               |
| 35  | rs7759001                              | 27341409                          | 6                                | ENSG00000124613 | <i>ZNF391</i>             | 0.82         | No               |
| 36  | rs2523946                              | 29941943                          | 6                                | ENSG00000227262 | <i>HCG4B</i>              | 0.32         | No               |
| 52  | rs3127573                              | 160681393                         | 6                                | ENSG00000122194 | <i>PLG</i>                | NA           | No               |
| 67  | rs4077515                              | 139266496                         | 9                                | ENSG00000213221 | <i>DNLZ</i>               | 0.86         | No               |
| 70  | rs10994860                             | 52645424                          | 10                               | ENSG00000204147 | <i>ASAH2B</i>             | 0.19         | No               |
| 73  | rs2074038                              | 44087989                          | 11                               | ENSG00000110455 | <i>ACCS</i>               | 0.99         | Yes              |
| 81  | rs626277                               | 72347696                          | 13                               | ENSG00000276644 | <i>DACH1</i>              | 0.55         | No               |
| 82  | rs2928148                              | 41401550                          | 15                               | ENSG00000187446 | <i>CHP1</i>               | NA           | No               |
| 83  | rs2467853                              | 45698793                          | 15                               | ENSG00000259520 | <i>CTD-<br/>2651B20.3</i> | 0.64         | No               |
| 83  | rs2467853                              | 45698793                          | 15                               | ENSG00000171763 | <i>SPATA5L1</i>           | 0.48         | No               |
| 91  | rs164748                               | 89708292                          | 16                               | ENSG00000131165 | <i>CHMP1A</i>             | 0.62         | No               |
| 91  | rs164748                               | 89708292                          | 16                               | ENSG00000015413 | <i>DPEP1</i>              | 0.37         | No               |
| 91  | rs164748                               | 89708292                          | 16                               | ENSG00000204991 | <i>SPIRE2</i>             | 0.92         | Yes              |
| 93  | rs4227                                 | 7491177                           | 17                               | ENSG00000141504 | <i>SAT2</i>               | NA           | No               |
| 95  | rs11078903                             | 37631924                          | 17                               | ENSG00000161395 | <i>PGAP3</i>              | 0.51         | No               |
| 101 | rs12458009                             | 59350507                          | 18                               | ENSG00000176641 | <i>RNF152</i>             | 0.37         | No               |
| 107 | rs13038305                             | 23610262                          | 20                               | ENSG00000173335 | <i>CST9</i>               | 0.81         | No               |

ID - internal identifier for each of 117 variants, RTC score - regulatory trait concordance score, NA - the GWAS SNP is located in hotspot hence RTC score could not be obtained, CKD-dt - chronic kidney disease and its defining traits, GWAS - genome-wide association study, SNP - single nucleotide polymorphism, Chr - Chromosome, eGene - gene whose expression is associated with at least one SNPs

**Supplementary table 4.** Genomic location, alleles and combined annotation dependant depletion scores for all single nucleotide polymorphisms in the rs2049805 locus.

| dbSNP rsID | GRCh37 chromosome | GRCh37 position | Reference allele | Alternate allele | CADD raw score | Phred-scaled CADD score |
|------------|-------------------|-----------------|------------------|------------------|----------------|-------------------------|
| rs4072037  | 1                 | 155162067       | C                | T                | 1.284          | 12.19                   |
| rs12411216 | 1                 | 155164480       | C                | A                | 0.991          | 10.61                   |
| rs2990245  | 1                 | 155197462       | C                | T                | 0.759          | 9.205                   |
| rs497829   | 1                 | 155193532       | C                | G                | 0.554          | 7.832                   |
| rs2075570  | 1                 | 155182164       | C                | T                | 0.400          | 6.611                   |
| rs2974930  | 1                 | 155196717       | A                | G                | 0.288          | 5.576                   |
| rs2049805  | 1                 | 155194980       | T                | C                | 0.212          | 4.801                   |
| rs914615   | 1                 | 155175892       | A                | G                | 0.105          | 3.664                   |
| rs2974929  | 1                 | 155197268       | T                | C                | 0.061          | 3.201                   |
| rs2974931  | 1                 | 155195215       | C                | G                | 0.037          | 2.955                   |
| rs2066981  | 1                 | 155172379       | G                | A                | -0.154         | 1.359                   |
| rs2974937  | 1                 | 155168849       | C                | T                | -0.158         | 1.335                   |
| rs2990220  | 1                 | 155190254       | T                | A                | -0.265         | 0.796                   |
| rs2974935  | 1                 | 155181843       | G                | A                | -0.378         | 0.438                   |
| rs28445596 | 1                 | 155186729       | T                | C                | -0.463         | 0.271                   |
| rs370545   | 1                 | 155175390       | A                | G                | -0.475         | 0.253                   |

dbSNP rsID - single nucleotide polymorphism database identifier, CADD - combined annotation dependant depletion

**Supplementary table 5.** Association between 6 CpG probes proximal to MUC1 promoter and rs12411216 genotype in TRANSLATE study.

| <b>Probe ID</b> | <b>Beta</b> | <b>Standard error</b> | <b>T-statistic</b> | <b>P-value</b> |
|-----------------|-------------|-----------------------|--------------------|----------------|
| cg03425468      | 0.04        | 0.04                  | 1.22               | 0.2248         |
| cg07945002      | 0.01        | 0.03                  | 0.38               | 0.7073         |
| cg12678006      | -0.01       | 0.02                  | -0.45              | 0.6511         |
| cg09417889      | 0.05        | 0.04                  | 1.39               | 0.1677         |
| cg15434337      | 0.02        | 0.07                  | 0.29               | 0.7694         |
| cg27538026      | 0.00        | 0.06                  | -0.03              | 0.9774         |

Beta - linear regression coefficient, SE - standard error, P-value - level of statistical significance

**Supplementary table 6.** Association between 6 CpG probes proximal to MUC1 promoter and renal expression of MUC1 - TRANSLATE study.

| <b>Probe ID</b> | <b>Beta</b> | <b>SE</b> | <b>T-statistic</b> | <b>P-value</b> |
|-----------------|-------------|-----------|--------------------|----------------|
| cg03425468      | -57.52      | 63.33     | -0.91              | 0.3665         |
| cg07945002      | -114.68     | 74.61     | -1.54              | 0.1282         |
| cg12678006      | 49.28       | 96.64     | 0.51               | 0.6115         |
| cg09417889      | -80.78      | 57.59     | -1.40              | 0.1645         |
| cg15434337      | -47.11      | 31.97     | -1.47              | 0.1445         |
| cg27538026      | -53.67      | 35.46     | -1.51              | 0.1341         |

Beta - linear regression coefficient, SE - standard error, P-value - level of statistical significance

**Supplementary table 7.** Average renal expression of MUC1 mRNA isoforms in TRANSLATE study and TCGA. Transcripts are ordered from the most abundant (top) to least abundant (bottom).

---

| <b>Ensembl MUC1 mRNA symbol</b> | <b>Mean expression (transcripts per million)</b> |
|---------------------------------|--------------------------------------------------|
| ENST00000485118                 | 42.78                                            |
| ENST00000612778-as              | 36.79                                            |
| ENST00000612778                 | 23.15                                            |
| ENST00000620103                 | 14.98                                            |
| ENST00000462317                 | 10.08                                            |
| ENST00000468978                 | 6.05                                             |
| ENST00000368392                 | 2.55                                             |
| ENST00000368390                 | 1.47                                             |
| ENST00000368393                 | 0.66                                             |
| ENST00000614519                 | 0.52                                             |

---



**Supplementary table 8.** Causality between renal expression of total *MUC1* and its mRNA isoforms and estimated glomerular filtration rate - robust inverse variance weighted method, Mendelian randomisation-Egger regression (pleiotropy and heterogeneity test).

| <b>MUC1 isoform</b> | <b>MUC1 isoform symbol</b> | <b>Estimate-IVW-robust</b> | <b>P-value-IVW-robust</b> | <b>P-value-pleiotropy</b> | <b>P-value-heter</b> |
|---------------------|----------------------------|----------------------------|---------------------------|---------------------------|----------------------|
| ENST00000612778-as  | <i>MUC1-as</i>             | -0.003                     | 2.05E-10                  | 0.655                     | 0.552                |
| ENST00000620103     | <i>MUC1-001</i>            | -0.004                     | 1.91E-08                  | 0.740                     | 0.514                |
| ENSG00000185499     | <i>MUC1</i>                | -0.014                     | 1.14E-07                  | 0.701                     | 0.803                |
| ENST00000368390     | <i>MUC1-014</i>            | -0.004                     | 7.92E-07                  | 0.560                     | 0.677                |
| ENST00000612778     | <i>MUC1-207</i>            | 0.002                      | 3.84E-05                  | 1.000                     | 0.383                |
| ENST00000368392     | <i>MUC1-002</i>            | 0.005                      | 3.65E-03                  | 0.174                     | 0.253                |

as - alternative splicing, IVW - inverse variance weighted method, Estimate-IVW-robust - correlation coefficient from robust IVW method, heter - heterogeneity

**Supplementary table 9.** Post-imputation genotype quality control applied to imputed variants in the TRANSLATE study and TCGA.

|                                               | <b>TRANSLATE</b> | <b>TCGA</b> |
|-----------------------------------------------|------------------|-------------|
| Imputed variants                              | 47,100,201       | 47,101,134  |
| Variants mapping to the same genomic position | 474,948          | 474,948     |
| MAF < 5%                                      | 39,590,910       | 39,448,754  |
| R <sup>2</sup> < 0.40                         | 35,266,275       | 34,907,262  |
| Non-SNPs                                      | 2,955,459        | 2,955,459   |
| HWE < 1x10E-6                                 | 21               | 395         |
| Final number of SNPs                          | 5,760,291        | 5,892,571   |

SNP - single nucleotide polymorphism, MAF – minor allele frequency, R<sup>2</sup> – imputation coefficient, HWE – Hardy-Weinberg equilibrium.
